# Supplementary material for: Design and Development of a Person-Centered Patient Portal Using Participatory Stakeholder Co-Design
Source: PubMed Central journal article supplement (PMC6388099; doi:10.2196/11371), 2019-02-11
Supplement: jmir_v21i2e11371_app2.pdf [file jmir_v21i2e11371_app2.pdf]

## Multimedia Appendix

Multimedia Appendix 1. Elements of person-centeredness, clinician acceptability, and informatics feasibility identified during the development of Opal and facilitated by the stakeholder co-design approach that was followed.

| Element                 | Examples                                                                                                                                                                            |
|-------------------------|-------------------------------------------------------------------------------------------------------------------------------------------------------------------------------------|
| Person-centeredness     | Inclusion of patient-identified features and functionality (e.g. view of progress in radiotherapy treatment planning process, direct phone numbers with extension-dialing built-in) |
|                         | Level of PHI provision chosen by patient                                                                                                                                            |
|                         | Active features (e.g. push notifications, waiting room management tools, patient-reported outcome and patient-satisfaction questionnaires)                                          |
|                         | Contextualized PHI (e.g. links to explanations of blood tests, clinical notes)                                                                                                      |
|                         | Useful/actionable data (e.g. appointment-specific preparation advice, ability to print or electronically share data)                                                                |
|                         | Multi-specialty data (e.g. all appointments, all clinical notes, regardless of source specialty within institution)                                                                 |
|                         | Connected data (e.g. longitudinal view of blood test trends as opposed to just individual results)                                                                                  |
|                         | Navigation aids (e.g. maps, hospital information, etc.)                                                                                                                             |
| Clinician-acceptability | Personalized and just-in-time educational material                                                                                                                                  |
|                         | Automation of PHI provision - no increased workload for staff                                                                                                                       |
|                         | Automation of educational material provision - no increased workload for staff                                                                                                      |
| Informatics feasibility | Provision of clinical notes only after clinician sign-off                                                                                                                           |
|                         | Use of existing databases only                                                                                                                                                      |
|                         | Generalized modular approach - expandable to any specialty                                                                                                                          |
|                         | Vendor-agnostic approach using institution's interface engine                                                                                                                       |
|                         | Privacy by design                                                                                                                                                                   |
