# Supplementary material for: Design and Development of a Person-Centered Patient Portal Using Participatory Stakeholder Co-Design
Source: PubMed Central journal article supplement (PMC6388099; doi:10.2196/11371), 2019-02-11
Supplement: jmir_v21i2e11371_app3.pdf [file jmir_v21i2e11371_app3.pdf]

Multimedia Appendix 2. Security and governance recommendations for development of a patient portal as identified by our institution's Security and Governance team.

| Area of Concern                    | Recommendation                                                                         |
|------------------------------------|----------------------------------------------------------------------------------------|
| Privacy and confidentiality of PHI | Security risk fully explained and disclosed to patient                                 |
|                                    | Reminder to patient of need to secure his/her device at each login                     |
|                                    | Automatic logout after five minutes of inactivity                                      |
|                                    | Secure sandboxing of data on user's device and deletion on logout                      |
|                                    | Use of security questions for second level of authentication                           |
|                                    | Final approval required from institution's senior management                           |
|                                    | Release of PHI coordinated with institution's Medical Records team                     |
|                                    | Requirement for technical vulnerability assessment pre-release                         |
| Maintenance of service             | Development of a service interruption plan-of-action                                   |
|                                    | Development of a policy and procedure manual for the complete solution                 |
|                                    | Development of an end-user manual for all staff-facing software                        |
|                                    | Full documentation for the software (patient and staff-facing)                         |
|                                    | Separation of development, test, and production environments                           |
|                                    | Failover and redundancy solution and regular tests                                     |
| Compliance                         | User logging and activity monitoring                                                   |
|                                    | Re-assessment of all security and governance aspects in case of major software changes |
